# Supplementary material for: The H3K9 methyltransferase Setdb1 regulates TLR4-mediated inflammatory responses in macrophages
Source: PubMed Central journal article supplement (PMC4924096; doi:10.1038/srep28845), 2016-06-28

## Supplementary Information

### The H3K9 methyltransferase Setdb1 regulates TLR4-mediated inflammatory responses in macrophages

Rumi Hachiya<sup>1</sup>, Takuya Shiihashi<sup>1,4</sup>, Ibuki Shirakawa<sup>2</sup>, Yorihiro Iwasaki<sup>1</sup>, Yoshihiro Matsumura<sup>6</sup>, Yumiko Oishi<sup>3</sup>, Yukiteru Nakayama<sup>5</sup>, Yoshihiro Miyamoto<sup>7</sup>, Ichiro Manabe<sup>8</sup>, Kozue Ochi<sup>9</sup>, Miyako Tanaka<sup>9</sup>, Nobuhito Goda<sup>4</sup>, Juro Sakai<sup>6</sup>, Takayoshi Suganami<sup>9,10\*</sup>, and Yoshihiro Ogawa<sup>1,11\*</sup>

<sup>1</sup>Department of Molecular Endocrinology and Metabolism, <sup>2</sup>Department of Organ Network and Metabolism, Graduate School of Medical and Dental Sciences, <sup>3</sup>Department of Cellular and Molecular Medicine, Medical Research Institute, Tokyo Medical and Dental University, Tokyo, Japan. <sup>4</sup>Department of Life Science and Medical Bio-Science, School of Advanced Science and Engineering, Waseda University, Tokyo, Japan. <sup>5</sup>Department of Cardiovascular Medicine, Graduate School of Medicine and Faculty of Medicine, <sup>6</sup>Division of Metabolic Medicine, Research Center for Advanced Science and Technology, University of Tokyo, Tokyo, Japan. <sup>7</sup>Department of Preventive Cardiology, National Cerebral and Cardiovascular Center, Osaka, Japan. <sup>8</sup>Department of Aging Research, Graduate School of Medicine, Chiba University, Chiba, Japan. <sup>9</sup>Department of Molecular Medicine and Metabolism, Research Institute of Environmental Medicine, Nagoya University, Nagoya, Japan. <sup>10</sup>Japan Science and Technology Agency, PRESTO, Tokyo, Japan. <sup>11</sup>Japan Agency for Medical Research and Development, AMED-CREST, Tokyo, Japan.

\*Correspondence and requests for materials should be addressed to T.Su. (e-mail:suganami@riem.nagoya-u.ac.jp) or Y.Og. (e-mail: ogawa.mem@tmd.ac.jp)

**Supplementary Table S1: Antibodies used in Western blotting and chromatin immunoprecipitation assay.**

|                       | Vendor                    | No.      | Application |
|-----------------------|---------------------------|----------|-------------|
| Setdb1                | Dr. Sakai <sup>16</sup>   | F0838    | WB          |
| Flag M2               | Sigma-Aldrich             | F3165    | WB          |
| NF- $\kappa$ B p65    | Santa Cruz Biotechnology  | sc-372   | WB, ChIP    |
| I $\kappa$ B $\alpha$ | Cell Signaling Technology | #9242    | WB          |
| JNK                   | Cell Signaling Technology | #9252    | WB          |
| p-JNK                 | Cell Signaling Technology | #9255    | WB          |
| p38                   | Cell Signaling Technology | #9212    | WB          |
| p-p38                 | Cell Signaling Technology | #9211    | WB          |
| ERK                   | Cell Signaling Technology | #9102    | WB          |
| p-ERK                 | Cell Signaling Technology | #9101    | WB          |
| Lamin A/C             | Santa Cruz Biotechnology  | sc-20681 | WB          |
| HDAC1                 | Santa Cruz Biotechnology  | sc-6298  | WB          |
| H3K9me3               | Abcam                     | #8898    | ChIP        |

**Supplementary Table S2: Antibodies used in flow cytometric analyses.**

|                | Vendor        | Clone    | Conjugated |
|----------------|---------------|----------|------------|
| CD11b          | BioLegend     | M1/70    | FITC       |
| F4/80          | BioLegend     | BM8      | APC/Cy7    |
| CD11c          | BD Pharmingen | HL3      | PE         |
| CD206          | BioLegend     | C068C2   | APC        |
| CD3 $\epsilon$ | BioLegend     | 145-2C11 | PE         |
| CD45R (B220)   | BioLegend     | RA3-6B2  | APC        |
| Ly6G           | BioLegend     | 1A8      | APC/Cy7    |

**Supplementary Table S3: PCR primers for mRNA expression.**

|                     |    |                           |
|---------------------|----|---------------------------|
| Setdb1              | Fw | AAGAGTGTCTGCCCACAGGG      |
|                     | Rv | CATGTTTGGGTCACAATTGCA     |
| IL6                 | Fw | ACAACCACGGCCTTCCCTACTT    |
|                     | Rv | CACGATTTCCCAGAGAACATGTG   |
| IL12b               | Fw | ACATCTACCGAAGTCCAATGCA    |
|                     | Rv | GGAATTGTAATAGCGATCCTGAGC  |
| MyD88               | Fw | CACGGTGGTGGTTGTTTCTGAC    |
|                     | Rv | TGGAGACAGGCTGAGTGCAA      |
| TLR2                | Fw | AGAGAGTAGTTCGGCCTTTCC     |
|                     | Rv | GTGCATCCATCATTGGGACAG     |
| TLR4                | Fw | AGAAATTCCTGCAGTGGGTCA     |
|                     | Rv | TCTCTACAGGTGTTGCACATGTCA  |
| TRAF2               | Fw | AGAGAGTAGTTCGGCCTTTCC     |
|                     | Rv | GTGCATCCATCATTGGGACAG     |
| TRAF6               | Fw | AAAGCGAGAGATTCTTTCCCTG    |
|                     | Rv | ACTGGGGACAATTCCTAGAGC     |
| NF- $\kappa$ B p65  | Fw | TGTGGAGATCATCGAACAGCCG    |
|                     | Rv | TTCCTGGTCCTGTGTAGCCATTGAT |
| NF- $\kappa$ B1 p50 | Fw | CACTGCTCAGGTCCACTGTC      |
|                     | Rv | CTGTCACTATCCCGGAGTTCA     |
| NF- $\kappa$ B2 p52 | Fw | GGCCGGAAGACCTATCCTACT     |
|                     | Rv | CTACAGACACAGCGCACACT      |
| c-Rel               | Fw | GCCGTGTGAACAAGAACTGTGGAA  |
|                     | Rv | TTGTGAAAAAACACCTCTGGCTTCC |
| CD14                | Fw | CGAACAAGCCCGTGGAACCT      |
|                     | Rv | CAAGCACACGCTCCATGGTC      |
| LBP                 | Fw | TCGCCATCTCTGACTCTTCC      |
|                     | Rv | GGAGGTCCACTGAAATGGTG      |
| MD-2                | Fw | CGCTGCTTTCTCCCATATTGA     |
|                     | Rv | CCTCAGTCTTATGCAGGGTTCA    |
| TIRAP               | Fw | CCTCCTCCACTCCGTCCAA       |
|                     | Rv | CTTTCCTGGGAGATCGGCAT      |

|      |    |                        |
|------|----|------------------------|
| TRIF | Fw | TCCCTTCTCTCTCCTCCTCCTC |
|      | Rv | CAGCACAGACCTGGCTGTAGG  |
| TRAM | Fw | GCAGTACCACTTCCCAGCTAA  |
|      | Rv | ACTCATTGACACTGGGCTCT   |

**Supplementary Table S4: PCR primers for ChIP assay.**

|                                                         |    |                                |
|---------------------------------------------------------|----|--------------------------------|
| IL6                                                     | Fw | CCTGCGTTTAAATAACATCAGCTTTAGCTT |
|                                                         | Rv | GCACAATGTGACGTCGTTTAGCATCGAA   |
| GAPDH (negative control<br>for H3K9me ChIP)             | Fw | ATCCTGTAGGCCAGGTGATG           |
|                                                         | Rv | AGGCTCAAGGGCTTTTAAGG           |
| GAPDH (negative control<br>for NF- $\kappa$ B p65 ChIP) | Fw | AATGTGTCCGTCGTGGATCT           |
|                                                         | Rv | CATCGAAGGTGGAAGAGTGG           |

**Supplementary Table S5: The 42 genes upregulated by lipid A treatment in KO macrophages.**

| Gene symbol   | WT (Lipid A vs. Veh)<br>Fold change | KO vs. WT (Lipid A)<br>Fold change |
|---------------|-------------------------------------|------------------------------------|
| Il1b          | 12.5                                | 42.2                               |
| Mmp13         | 2.3                                 | 15.9                               |
| Ccl2          | 14.9                                | 14.1                               |
| Il1a          | 6.1                                 | 12.0                               |
| Plagl1        | 3.7                                 | 9.8                                |
| Ccl7          | 4.6                                 | 7.9                                |
| Il12b         | 14.1                                | 7.8                                |
| Il6           | 1910.6                              | 6.8                                |
| Ccnd2         | 4.7                                 | 6.0                                |
| Slc7a2        | 7.4                                 | 5.7                                |
| Cxcl1         | 23.5                                | 5.6                                |
| Ppfia3        | 4.1                                 | 5.4                                |
| Socs3         | 4.2                                 | 5.3                                |
| LOC433762     | 5.6                                 | 5.2                                |
| Ptx3          | 5.8                                 | 5.0                                |
| Ptgs2         | 53.3                                | 5.0                                |
| A130040M12Rik | 2.2                                 | 4.9                                |
| Hbegf         | 2.5                                 | 4.8                                |
| Inhba         | 3.9                                 | 4.7                                |
| Flnb          | 2.1                                 | 4.7                                |
| Ccl4          | 20.0                                | 4.4                                |
| Cd40          | 23.1                                | 4.0                                |
| Aqp9          | 3.6                                 | 3.9                                |
| Ear-ps9       | 4.1                                 | 3.9                                |
| Rhox2g        | 4.1                                 | 3.9                                |
| Cd83          | 3.3                                 | 3.8                                |
| Olr1          | 6.6                                 | 3.7                                |
| Cav1          | 4.8                                 | 3.6                                |
| Mki67         | 10.8                                | 3.6                                |
| Niacr1        | 19.8                                | 3.5                                |
| Bcl2l11       | 2.5                                 | 3.5                                |
| Zc3h12a       | 2.1                                 | 3.4                                |

|        |      |     |
|--------|------|-----|
| Ier3   | 3.4  | 3.3 |
| Slfn4  | 10.7 | 3.3 |
| Flrt3  | 3.1  | 3.3 |
| Stat5a | 2.6  | 3.2 |
| Ccrn4l | 4.0  | 3.2 |
| Ccl3   | 9.4  | 3.2 |
| Sdc4   | 4.7  | 3.1 |
| Tslp   | 14.1 | 3.1 |
| Tpbp   | 33.5 | 3.0 |
| Sh3bp5 | 7.3  | 3.0 |



**Supplementary Table S6: Gene ontology analysis of the 42 genes.**

The top 10 significantly enriched categories are shown.

| Pathway name                                                           | Entities<br>p value | Submitted entities found            | #<br>Entities<br>found | #<br>Entities<br>total |
|------------------------------------------------------------------------|---------------------|-------------------------------------|------------------------|------------------------|
| Chemokine receptors<br>bind chemokines                                 | 1.5E-08             | Cxcl1;Ccl2;Ccl3;Ccl7;Ccl4           | 7                      | 55                     |
| Peptide ligand-binding<br>receptors                                    | 6.1E-05             | Cxcl1;Ccl2;Ccl3;Ccl7;Ccl4           | 7                      | 194                    |
| Transport of glycerol<br>from adipocytes to the<br>liver by Aquaporins | 1.2E-04             | Aqp9                                | 2                      | 3                      |
| Signaling by Interleukins                                              | 4.5E-04             | Socs3;Il1a;Il1b;Stat5a;Il1a;Il6;Il6 | 5                      | 124                    |
| Interleukin-1 processing                                               | 6.3E-04             | Il1a;Il1b;Il1a                      | 2                      | 7                      |
| Class A/1<br>(Rhodopsin-like<br>receptors)                             | 7.4E-04             | Cxcl1;Ccl2;Ccl3;Niacr1;Ccl7;Ccl4    | 8                      | 384                    |
| Senescence-Associated<br>Secretory Phenotype<br>(SASP)                 | 1.0E-03             | Il1a;Il1a;Il6;Il6                   | 4                      | 85                     |
| Interleukin-6 signaling                                                | 3.2E-03             | Socs3;Il6;Il6                       | 2                      | 16                     |
| Passive transport by<br>Aquaporins                                     | 4.9E-03             | Aqp9                                | 2                      | 20                     |
| Signaling by Leptin                                                    | 7.0E-03             | Socs3;Stat5a                        | 2                      | 24                     |

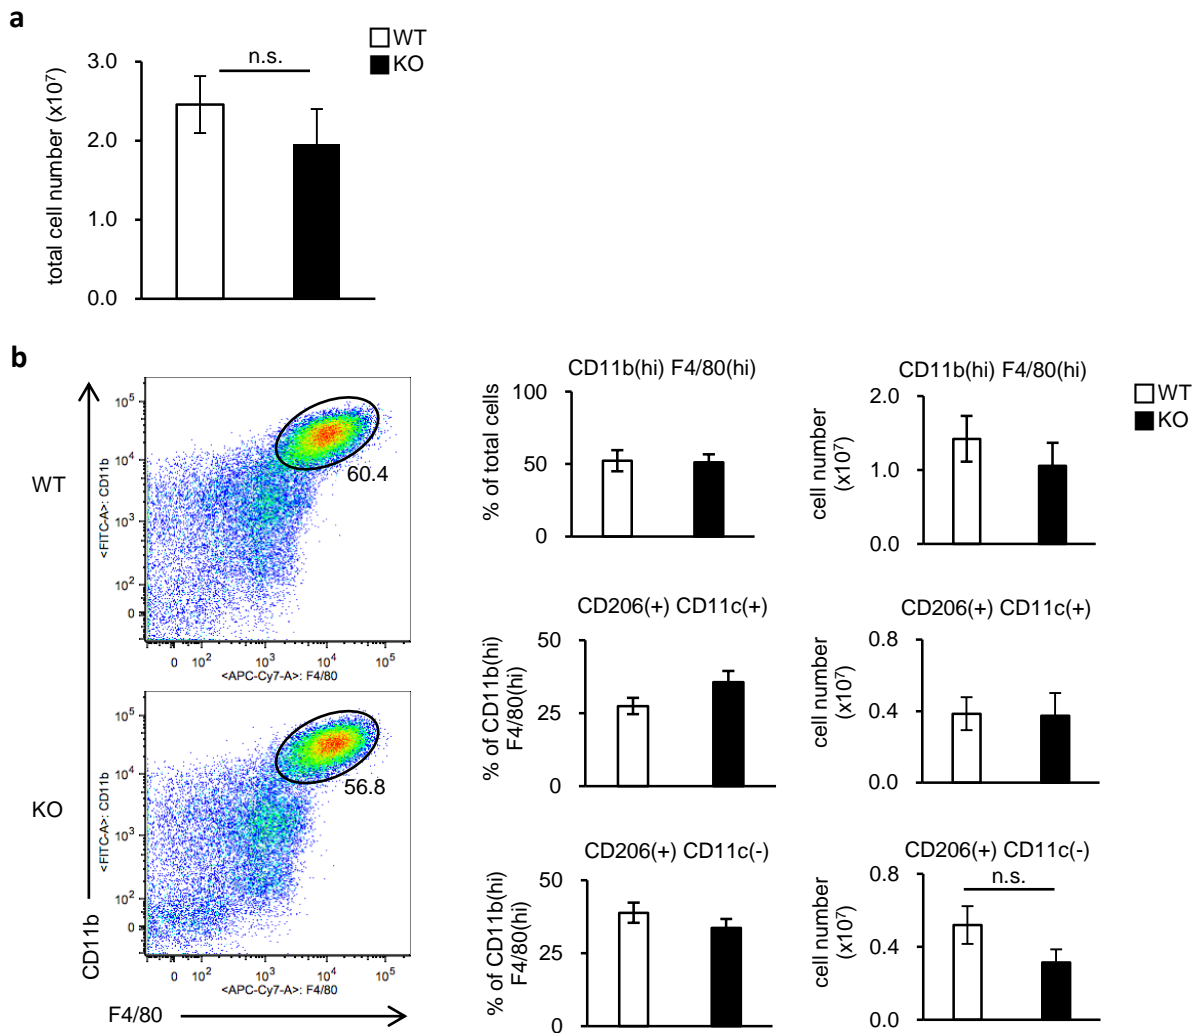

**Supplementary Figure S1. Characterization of thioglycollate-elicited exudate cells from *Setdb1*-deficient (KO) and wildtype (WT) mice.**

(a) The total exudate cell number. (b) Representative FACS plots to detect peritoneal macrophages using anti-CD11b and anti-F4/80 antibodies. Peritoneal macrophages were defined as CD11b<sup>hi</sup> F4/80<sup>hi</sup> cells, and the numbers in the plots indicate the percentage in the total exudate cells. The polarized macrophages were analyzed using anti-CD206 and anti-CD11c antibodies (n.s.: not significant, n = 7).

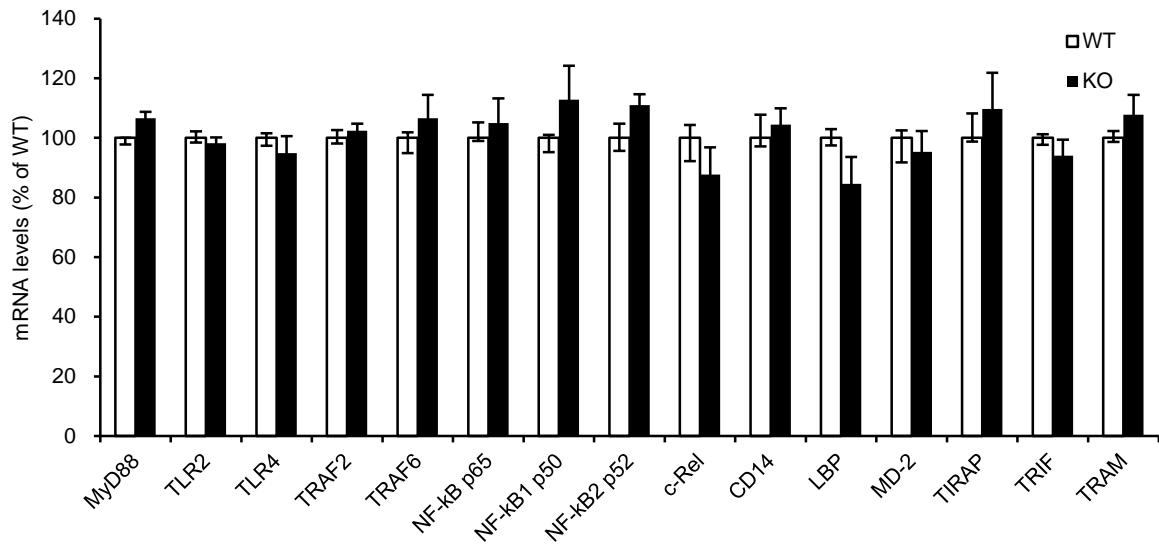

**Supplementary Figure S2. Setdb1 is dispensable for expression of genes related to the TLR4 signaling pathways.**

KO and WT peritoneal macrophages were treated with lipid A (10 ng/ml) for 4 hours, and mRNA expression levels were analyzed by quantitative real-time PCR (n = 3).

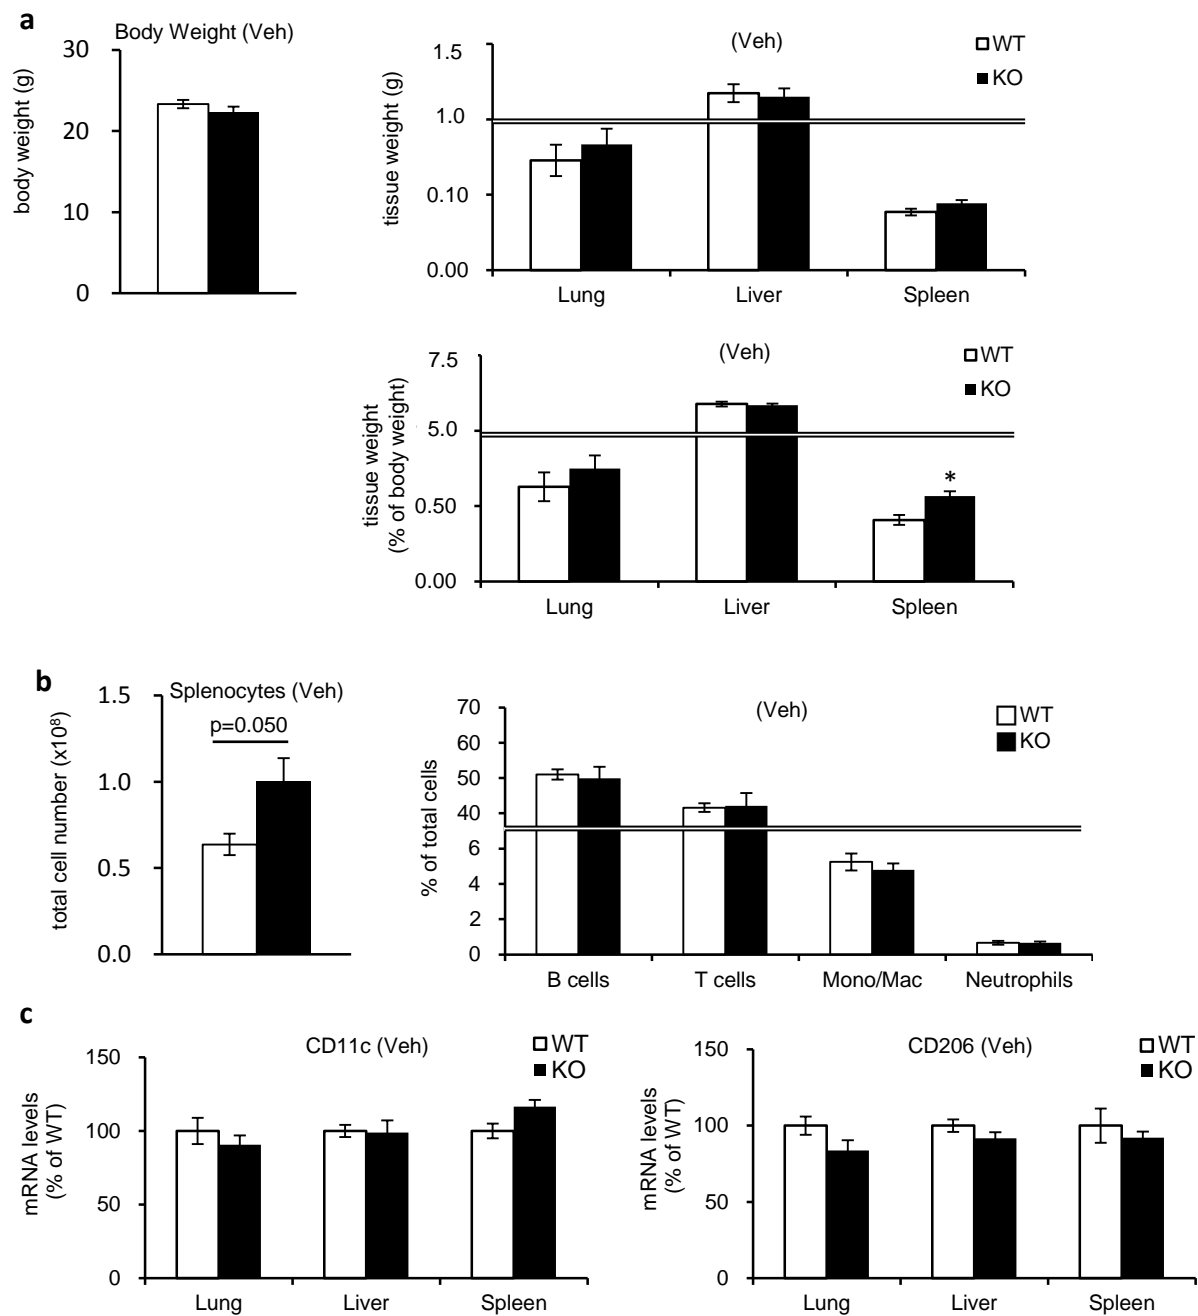

**Supplementary Figure S3. Baseline characteristics of vehicle-treated *Setdb1*-deficient mice.**

(a) Body weight and tissue weights (\* $P < 0.05$ ; WT,  $n = 5$ ; KO,  $n = 10$ ). (b) The total cell number and population of splenocytes were analyzed with flow cytometry. B lymphocytes, B220<sup>+</sup>; T lymphocytes, CD3e<sup>+</sup>; monocytes/macrophages, CD11b<sup>+</sup>Ly6G<sup>-</sup>; neutrophils, CD11b<sup>+</sup>Ly6G<sup>+</sup>. (c) mRNA expression of CD11c and CD206 in lung, liver, and spleen.

# Supplementary Figure S4. Full images of Western blots

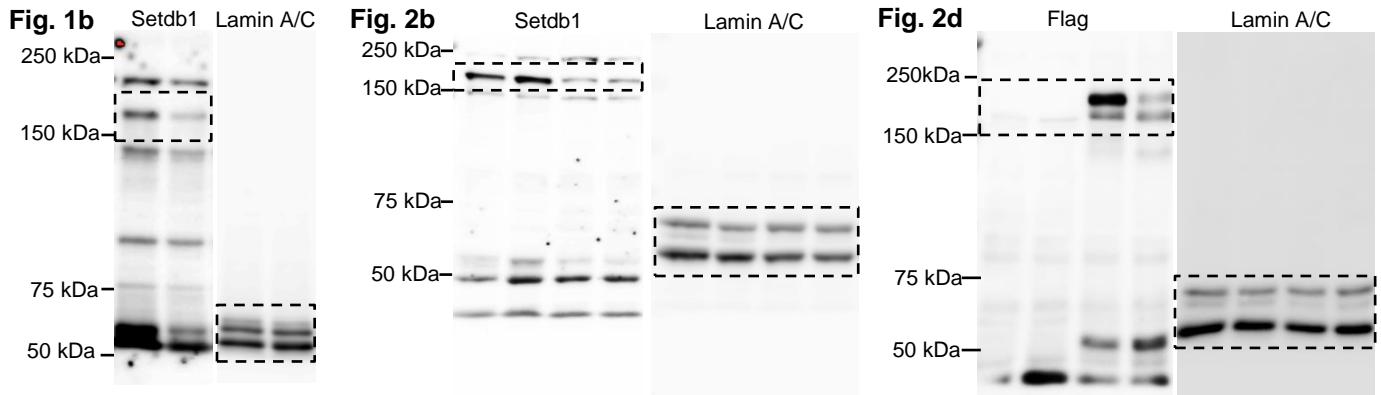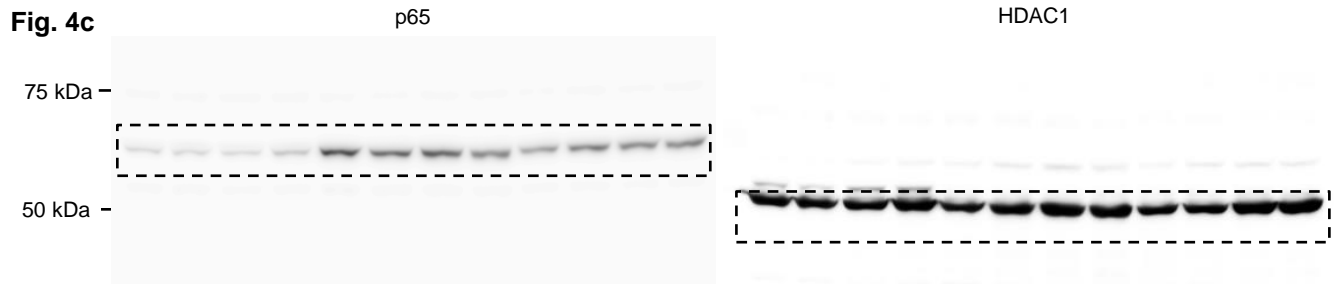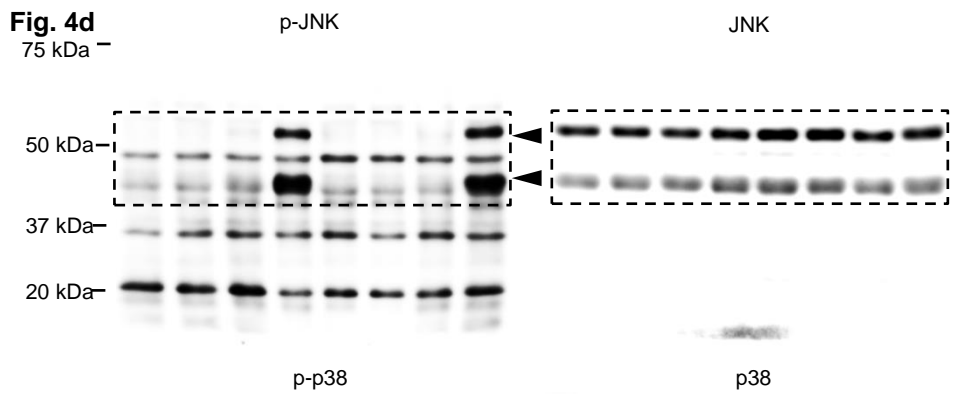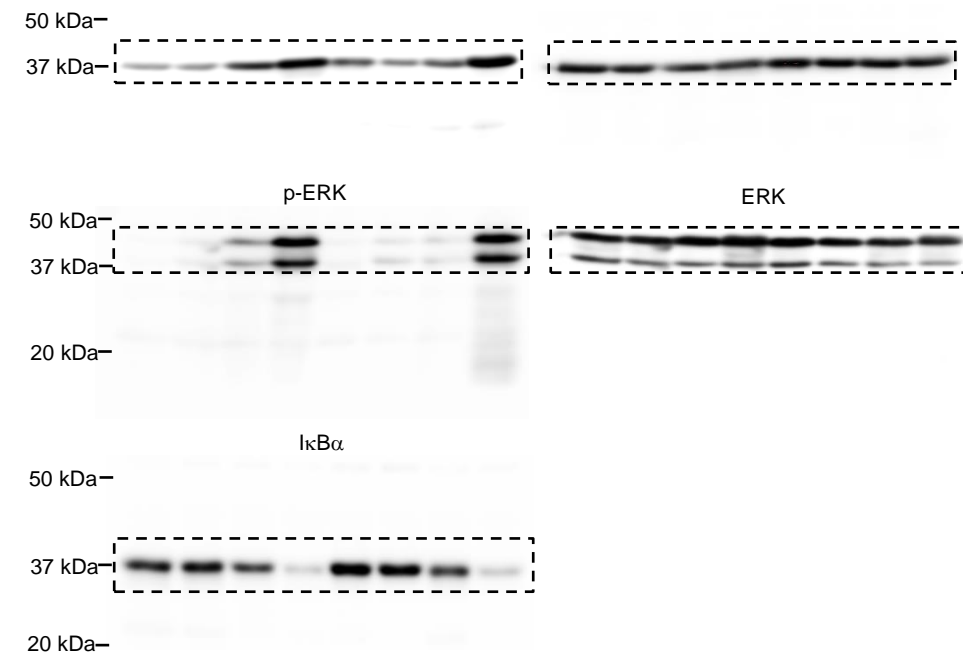

Supplementary Figure S4. Full images of Western blots (continued)

Fig. 4e

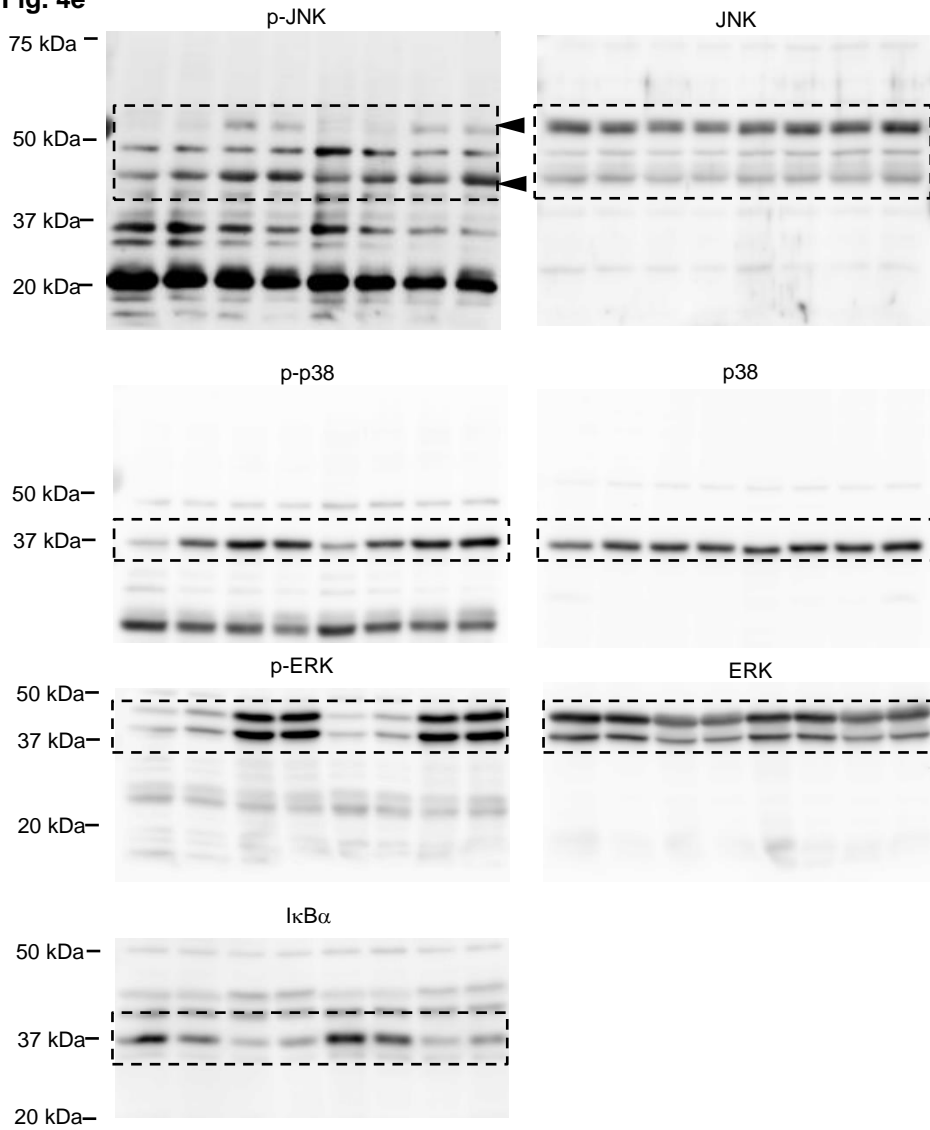

Supplement: srep28845-s1.pdf [file srep28845-s1.pdf]
